# Supplementary material for: Cognitive function and brain plasticity in a rat model of shift work: role of daily rhythms, sleep and glucocorticoids
Source: Sci Rep. 2020 Aug 4;10:13141. doi: 10.1038/s41598-020-69969-x (PMC7403587; doi:10.1038/s41598-020-69969-x)
Supplement: Supplementary file 1 — Supplementary Information. [file 41598_2020_69969_MOESM1_ESM.pdf]

## **Supplementary file**

Article title: Cognitive function and brain plasticity in a rat model of shift work: role of daily rhythms, sleep and glucocorticoids

Authors: Andrea R Marti<sup>1</sup>, Torhild T Pedersen<sup>1</sup>, Jonathan P. Wisor<sup>2</sup>, Jelena Mrdalj<sup>1</sup>, Øystein Holmelid<sup>1</sup>, Sudarshan Patil<sup>3</sup>, Peter Meerlo<sup>4</sup>, Clive R Bramham<sup>3</sup>, Janne Grønli<sup>1</sup>

1 Bergen Stress and Sleep Group, Department of Biological and Medical Psychology, Faculty of Psychology, University of Bergen, Bergen, Norway

2 College of Medicine, Washington State University, Spokane, Washington, USA

3 Department of Biomedicine, Faculty of Medicine, University of Bergen, Bergen, Norway

4 Groningen Institute for Evolutionary Life Sciences, University of Groningen, Groningen, Netherlands

Corresponding author's address and current e-mail: Jonas Liesvei 91, 5009 Bergen, Norway, andrea.marti@uib.no

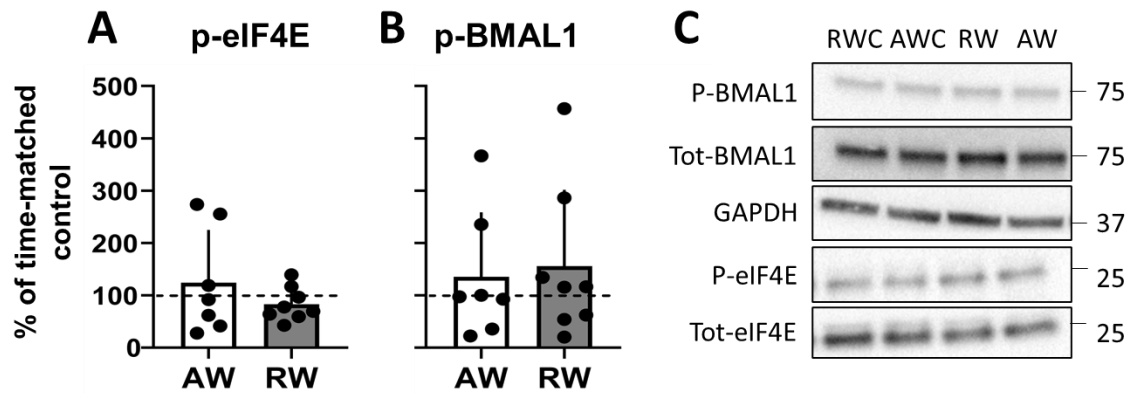

**Fig. S1.** Expression of inputs of promoters of cap-dependent translation initiation in prefrontal cortex following 3 days active work (AW, collected at zeitgeber (ZT0) and rest work (RW, collected at ZT12). (A-B) western blot analysis. (C) Representative immunoblots for (A-B). Full-length blots/gels are presented in Supplementary Figure S3. Blots normalized to GAPDH in the corresponding immunoblot. Phospho-protein normalized to total protein in the corresponding immunoblot. Quantification of immunoblots are expressed as percentage change relative to time-matched undisturbed control (AWC collected at ZT0, RWC collected at ZT12; normalized to 100%). Plots show mean  $\pm$ SEM, with scatter plot overlaid. N = 7-8/group.

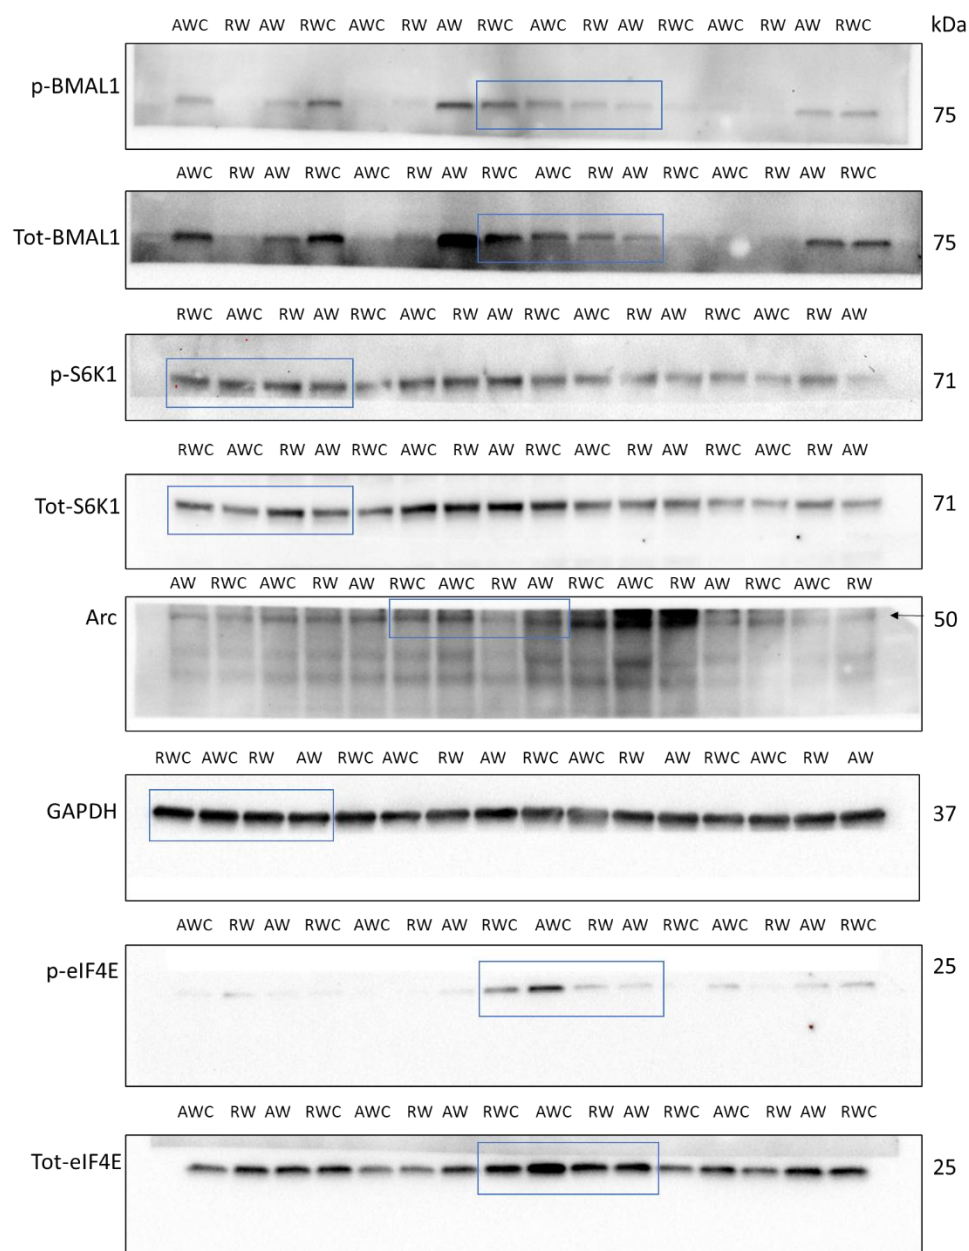

**Fig. S2.** Representative immunoblots for figure 3. Membranes were cut to allow for probing for different proteins. Blue squares indicate the part of the original image that was cropped.

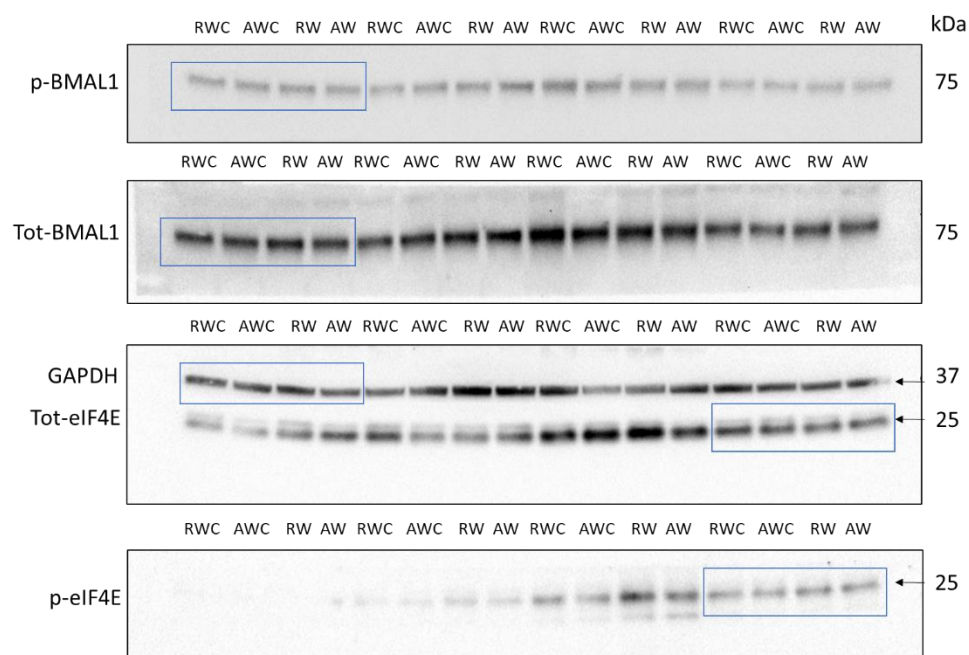

**Fig. S3.** Representative immunoblots for figure S1. Membranes were cut to allow for probing for different proteins. Blue squares indicate the part of the original image that was cropped.

**Table S1:** Hierarchical regression analyses for predictors of Morris Water Maze (MWM) performance following simulated shift work, test for contribution of SWE in NREM sleep.

| MWM latency to platform                                                                                             |                                   |
|---------------------------------------------------------------------------------------------------------------------|-----------------------------------|
| <b>Step 1, work condition</b>                                                                                       | $F_{(1,11)} = 3.96,$<br>$p = .07$ |
| AW/RW                                                                                                               |                                   |
| $R^2$                                                                                                               | .23                               |
| Adj. $R^2$                                                                                                          | .20                               |
| <b>Step 2, daily rhythm dynamics</b>                                                                                | $F_{(3,9)} = 2.52,$<br>$p = .12$  |
| Amplitude change                                                                                                    |                                   |
| REM sleep latency                                                                                                   |                                   |
| $R^2$                                                                                                               | .46                               |
| Adj. $R^2$ (change)                                                                                                 | .28 (.08)                         |
| <b>Step 3, sleep intensity</b>                                                                                      | $F_{(4,7)} = 1.40,$<br>$p = .33$  |
| SWE in NREM sleep                                                                                                   |                                   |
| $R^2$                                                                                                               | .46                               |
| Adj. $R^2$ (change)                                                                                                 | .13 (-.15)                        |
| AW active work, RW rest work, SWE slow wave energy, REM rapid eye movement sleep, NREM non rapid eye movement sleep |                                   |

**Table S2:** Hierarchical regression analyses for predictors of Morris Water Maze (MWM) performance following simulated shift work, test for contribution of 72h cumulated sleep parameters.

|                                                                                               | MWM latency to platform           |
|-----------------------------------------------------------------------------------------------|-----------------------------------|
| <b>Step 1, work condition</b>                                                                 | $F_{(1,11)} = 3.96,$<br>$p = .07$ |
| AW/RW                                                                                         |                                   |
| $R^2$                                                                                         | .23                               |
| Adj. $R^2$                                                                                    | .20                               |
| <b>Step 2, daily rhythm dynamics</b>                                                          | $F_{(3,9)} = 2.52,$<br>$p = .12$  |
| Amplitude change                                                                              |                                   |
| REM sleep latency                                                                             |                                   |
| $R^2$                                                                                         | .46                               |
| Adj. $R^2$ (change)                                                                           | .28 (.08)                         |
| <b>Model 3, cumulated sleep</b>                                                               | $F_{(5,6)} = 1.22,$<br>$p = .39$  |
| NREM sleep time                                                                               |                                   |
| REM sleep time                                                                                |                                   |
| $R^2$                                                                                         | .47                               |
| Adj. $R^2$ (change)                                                                           | .08 (-.20)                        |
| AW active work, RW rest work, REM rapid eye movement sleep, NREM non rapid eye movement sleep |                                   |

**Table S3:** Hierarchical regression analyses for predictors of prefrontal cortex protein expression in inputs following simulated shift work.

|                                      | <b>p-eIF4E</b>                    | <b>p-BMAL1</b>                   |
|--------------------------------------|-----------------------------------|----------------------------------|
| <b>Step 1, work condition</b>        | $F_{(1,10)} = 1.24,$<br>$p = .29$ | $F_{(1,10)} = 0.1,$<br>$p = .76$ |
| AW <sup>1</sup> /RW <sup>2</sup>     |                                   |                                  |
| R <sup>2</sup>                       | .11                               | .01                              |
| Adj. R <sup>2</sup>                  | .02                               | -.09                             |
| <b>Step 2, daily rhythm dynamics</b> | $F_{(3,8)} = 1.8,$<br>$p = .22$   | $F_{(3,8)} = 0.35,$<br>$p = .79$ |
| Amplitude change                     |                                   |                                  |
| REM sleep latency                    |                                   |                                  |
| R <sup>2</sup>                       | .40                               | .11                              |
| Adj. R <sup>2</sup> (change)         | .18 (.16)                         | -.22 (-.13)                      |
| <b>Step 3, sleep drive</b>           | $F_{(5,5)} = 3.33,$<br>$p = .11$  | $F_{(5,5)} = 0.84,$<br>$p = .57$ |
| Duration of NREM sleep bouts         |                                   |                                  |
| SWE in QW                            |                                   |                                  |
| R <sup>2</sup>                       | .77                               | .46                              |
| Adj. R <sup>2</sup> (change)         | .54 (.36)                         | -.09 (.13)                       |
| <b>Model 4, serum corticosterone</b> | $F_{(6,4)} = 4.31,$<br>$p = .09$  | $F_{(6,4)} = 0.7,$<br>$p = .67$  |
| R <sup>2</sup>                       | .87                               | .51                              |
| Adj. R <sup>2</sup> (change)         | .67 (.13)                         | -.22 (-.13)                      |

AW active work, RW rest work, SWE slow wave energy, QW quiet wakefulness, REM rapid eye movement sleep, NREM non rapid eye movement sleep

**Table S4:** Hierarchical regression analyses for predictors of prefrontal cortex protein expression following simulated shift work, test for contribution of SWE in NREM sleep.

|                                      | <b>p-eIF4E</b>                   | <b>p-BMAL1</b>                     | <b>p-S6K1</b>                       | <b>Arc</b>                       |
|--------------------------------------|----------------------------------|------------------------------------|-------------------------------------|----------------------------------|
| <b>Step 1, work condition</b>        | $F_{(1,7)} = 3.98,$<br>$p = .09$ | $F_{(1,11)} = 8.68,$<br>$p = .013$ | $F_{(1,11)} = 72.39,$<br>$p < .001$ | $F_{(1,8)} = 1.76,$<br>$p = .22$ |
| AW/RW                                |                                  |                                    |                                     |                                  |
| $R^2$                                | .36                              | .44                                | .87                                 | .18                              |
| Adj. $R^2$                           | .27                              | .39                                | .86                                 | .08                              |
| <b>Step 2, daily rhythm dynamics</b> | $F_{(3,5)} = 2.59,$<br>$p = .17$ | $F_{(3,9)} = 5.07,$<br>$p = .03$   | $F_{(3,9)} = 22.58,$<br>$p < .001$  | $F_{(3,6)} = 0.49,$<br>$p = .70$ |
| Amplitude change                     |                                  |                                    |                                     |                                  |
| REM sleep latency                    |                                  |                                    |                                     |                                  |
| $R^2$                                | .61                              | .63                                | .88                                 | .20                              |
| Adj. $R^2$ (change)                  | .37 (.10)                        | .50 (.11)                          | .84 (-.02)                          | -.20 (-.28)                      |
| <b>Step 3, sleep intensity</b>       | $F_{(4,3)} = 1.27,$<br>$p = .44$ | $F_{(4,7)} = 2.8,$<br>$p = .111$   | $F_{(4,7)} = 13.91,$<br>$p = .002$  | $F_{(4,4)} = 0.77,$<br>$p = .60$ |
| SWE in NREM sleep                    |                                  |                                    |                                     |                                  |
| $R^2$                                | .63                              | .63                                | .89                                 | .43                              |
| Adj. $R^2$ (change)                  | .13 (-.24)                       | .40 (-.10)                         | .82 (-.02)                          | -.13 (.07)                       |

AW active work, RW rest work, SWE slow wave energy, REM rapid eye movement sleep, NREM non rapid eye movement sleep

**Table S5:** Hierarchical regression analyses for predictors of prefrontal cortex protein expression following simulated shift work, test for contribution of 72h cumulated sleep parameters.

|                                      | <b>p-eIF4E</b>                   | <b>p-BMAL1</b>                     | <b>p-S6K1</b>                       | <b>Arc</b>                       |
|--------------------------------------|----------------------------------|------------------------------------|-------------------------------------|----------------------------------|
| <b>Step 1, work condition</b>        | $F_{(1,7)} = 3.98,$<br>$p = .09$ | $F_{(1,11)} = 8.68,$<br>$p = .013$ | $F_{(1,11)} = 72.39,$<br>$p < .001$ | $F_{(1,8)} = 1.76,$<br>$p = .22$ |
| AW/RW                                |                                  |                                    |                                     |                                  |
| $R^2$                                | .36                              | .44                                | .87                                 | .18                              |
| Adj. $R^2$                           | .27                              | .39                                | .86                                 | .08                              |
| <b>Step 2, daily rhythm dynamics</b> | $F_{(3,5)} = 2.59,$<br>$p = .17$ | $F_{(3,9)} = 5.07,$<br>$p = .03$   | $F_{(3,9)} = 22.58,$<br>$p < .001$  | $F_{(3,6)} = 0.49,$<br>$p = .70$ |
| Amplitude change                     |                                  |                                    |                                     |                                  |
| REM sleep latency                    |                                  |                                    |                                     |                                  |
| $R^2$                                | .61                              | .63                                | .88                                 | .20                              |
| Adj. $R^2$ (change)                  | .37 (.10)                        | .50 (.11)                          | .84 (-.02)                          | -.20 (-.28)                      |
| <b>Step 3, cumulated sleep</b>       | $F_{(5,3)} = 0.98,$<br>$p = .54$ | $F_{(5,7)} = 3.48,$<br>$p = .07$   | $F_{(5,7)} = 12.4,$<br>$p = .002$   | $F_{(5,4)} = 0.32,$<br>$p = .88$ |
| NREM sleep time                      |                                  |                                    |                                     |                                  |
| REM sleep time                       |                                  |                                    |                                     |                                  |
| $R^2$                                | .62                              | .71                                | .90                                 | .28                              |
| Adj. $R^2$ (change)                  | -.02 (-.39)                      | .51 (.01)                          | .83 (-.01)                          | -.61 (-.41)                      |

AW active work, RW rest work, REM rapid eye movement sleep, NREM non rapid eye movement sleep
